# Supplementary material
Source: Springer Nature journal article supplement (http://www.nature.com/nbt/journal/v22/n10/extref/nbt1004-1221-S1.pdf)
Supplement: nbt1004-1221-S1.pdf [file nbt1004-1221-S1.pdf]

**Supplementary Table 1** Drugs for the wets

| Company                       | Drug                      | Status                          |
|-------------------------------|---------------------------|---------------------------------|
| QLT/Novartis                  | Visudyne                  | On market, 40 countries         |
| Miravant Medical Technologies | SnET2                     | US NDA submitted (3/2004)       |
| Eyetechn/Pfizer               | Macugen                   | US NDA submitted (6/2004)       |
| Alcon                         | Retaane                   | Phase 3, NDA expected (Q4 2004) |
| Genentech/Novartis            | Lucentis                  | Phase 3                         |
| Genaera                       | Squalamine                | Phase 2                         |
| OxiGENE                       | Combretastatin A4 prodrug | Phase 1/2                       |
| GenVec                        | AdPEDF                    | Phase 1                         |
| Regeneron/Sanofi-Aventis      | VEGF trap                 | Phase 1                         |

Source: ref. 1
